# Supplementary material for: Sands Subjected to Repetitive Loading Cycles and Associated Granular Degradation
Source: Atypon-hosted journal article supplement (doi:10.1061/jggefk.gteng-11153), 2023-09-14
Supplement: supplemental materials_jggefk.gteng-11153_park.pdf [file supplemental%20materials_jggefk.gteng-11153_park.pdf]

## SUPPLEMENTAL MATERIALS

*ASCE Journal of Geotechnical and Geoenvironmental Engineering*

# Sands Subjected to Repetitive Loading Cycles and Associated Granular Degradation

Junghee Park and J. Carlos Santamarina

**DOI:** 10.1061/JGGEFK.GTENG-11153

© ASCE 2023

[www.ascelibrary.org](http://www.ascelibrary.org)

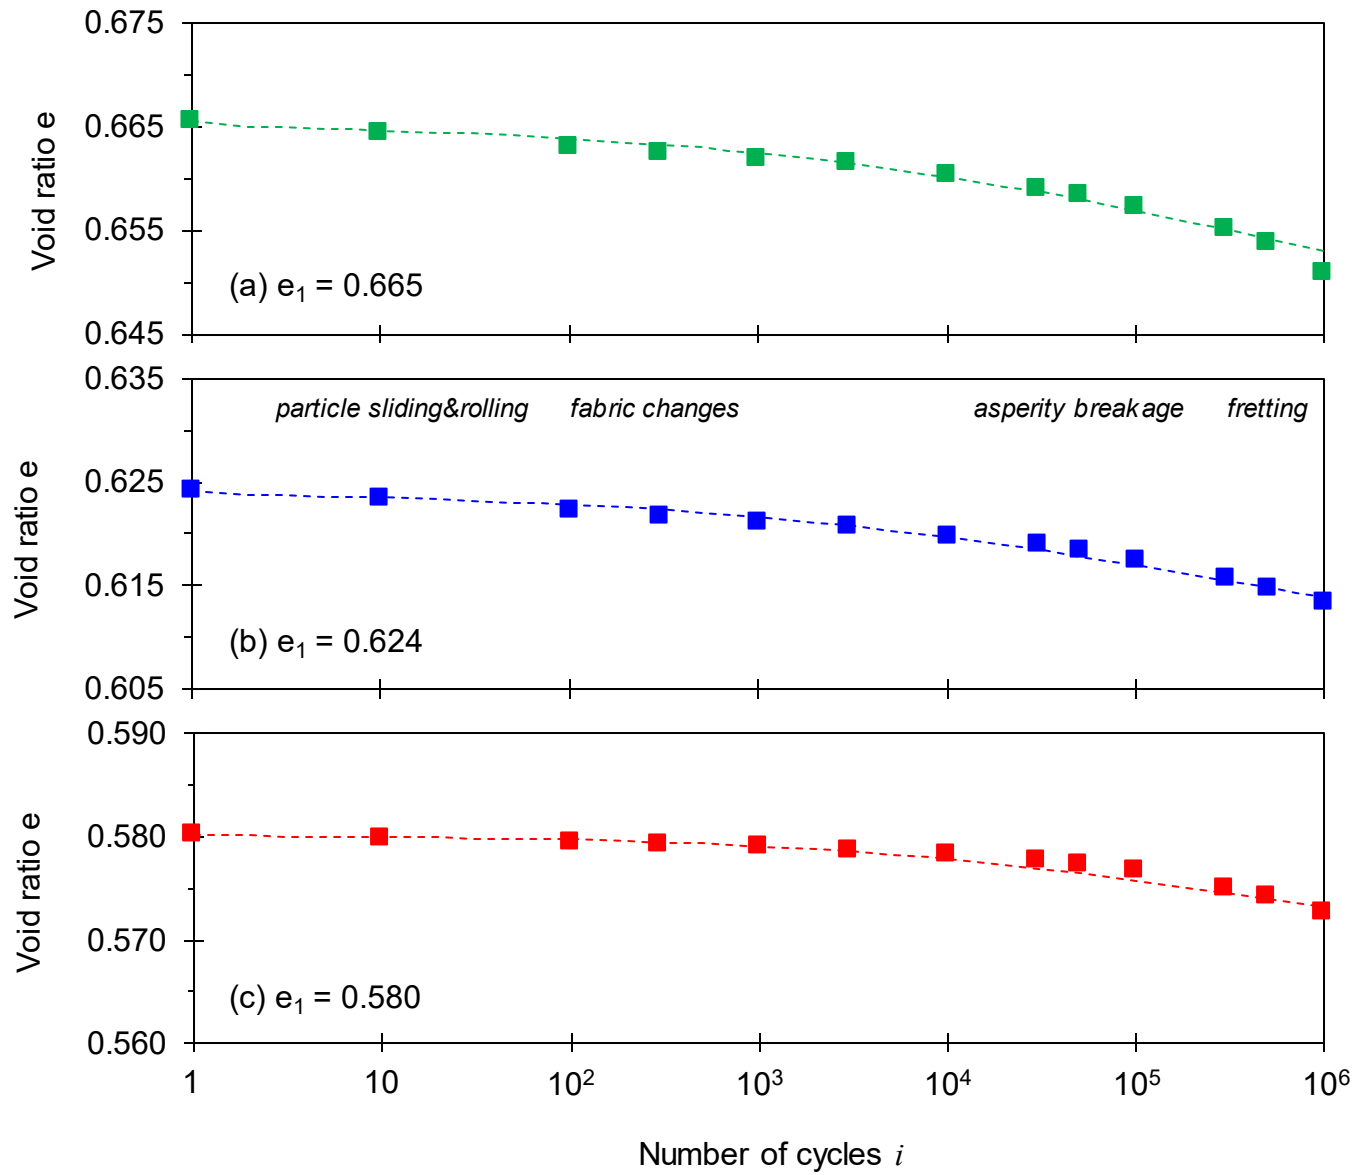

**Fig. S1.** Complementary low-stress amplitude study conducted with Ottawa 20/30 sand to  $N=10^6$  cycles. (a, b, c) Test #9, #10 and #11 in Table 2. For reference, the extreme void ratios are  $e_{\min} = 0.502$  and  $e_{\max} = 0.742$ .

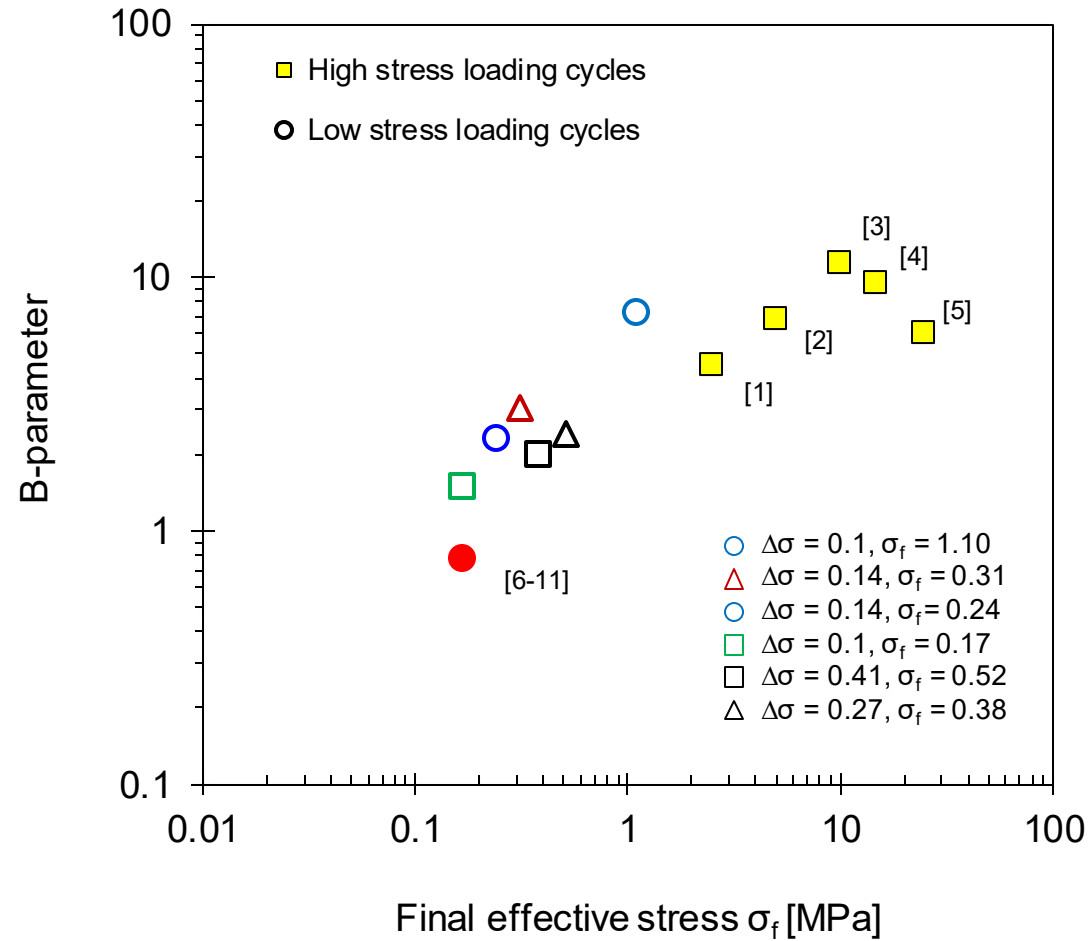

**Fig. S2.** B-parameter versus peak cyclic effective stress (Equation 4). Filled symbols indicate the B-parameters for this study and open symbols correspond to the B-parameters for data collected from published studies (Figure 10b). Numbers in square brackets [#] correspond to the test number (details in Table 2).
